# Supplementary material for: Mitral and aortic regurgitation following transcatheter aortic valve replacement
Source: PubMed Central journal article supplement — Heart. 2016 Feb 23;102(9):701–6. doi: 10.1136/heartjnl-2015-308842 (PMC4862065; doi:10.1136/heartjnl-2015-308842), 2016-02-23
Supplement: heartjnl-2015-308842supp_appendix.pdf [file heartjnl-2015-308842supp_appendix.pdf]

## Appendix online

### Polish Registry of Transcatheter Aortic Valve Implantation (POL-TAVI) - Steering Committee Members and participating centers

Polish Registry of Transcatheter Aortic Valve Implantation (POL-TAVI) - Steering Committee Members: Waldemar Banasiak, Dariusz Dudek, Krzysztof Filipiak, Piotr Hoffman, Zbigniew Kalarus, Bogusław Kapelak, Tomasz Kukulski, Bohdan Maruszewski, Andrzej Ochała, Piotr Olszówka, Grzegorz Opolski, Jan Rogowski, Janina Stępińska, Piotr Szymański, Krzysztof Wilczek, Adam Witkowski, Marian Zembala (head)

Polish Registry of Transcatheter Aortic Valve Implantation (POL-TAVI) – participating centers: Uniwersytecki Szpital Kliniczny w Białymstoku; Polsko- Amerykańskie Kliniki Serca, Bielsko; 10 Wojskowy Szpital Publiczny z Polikliniką, Bydgoszcz; Szpital Uniwersytecki im. dr Antoniego Jurasza w Bydgoszczy; Uniwersyteckie Centrum Kliniczne, Gdańsk; Szpital Kliniczny Nr 7 Śląskiego UM w Katowicach - Górnośląskie Centrum Medyczne, I Oddział Kardiochirurgii I Klinika Kardiochirurgii; Krakowski Szpital Specjalistyczny im. Jana Pawła II; Samodzielny Publiczny Szpital Kliniczny Nr 4 w Lublinie; Uniw. Szpital Kliniczny im. Wojskowej AM UM w Łodzi; Publiczny Samodzielny Zakład Opieki Zdrowotnej Wojewódzkie Centrum Medyczne w Opolu; Szpital Kliniczny Przemienienia Pańskiego Uniwersytetu Medycznego im. Karola Marcinkowskiego; Szpital Wojewódzki Nr 2 im. Św. Jadwigi Królowej w Rzeszowie; Samodzielny Publiczny Szpital Kliniczny Nr 2 PUM w Szczecinie; Centralny Szpital Kliniczny Ministerstwa Spraw Wewnętrznych i Administracji w Warszawie; Instytut Kardiologii im. Prymasa Tysiąclecia Stefana Kardynała Wyszyńskiego; Samodzielny Publiczny Centralny Szpital Kliniczny Oddział Kardiochirurgii Katedry i Kliniki, Chorób Wewnętrznych i Kardiologii AM w Warszawie, Wojskowy Instytut Medyczny w Warszawie; 4 Wojskowy Szpital Kliniczny z Polikliniką Samodzielny Publiczny Zakład Opieki Zdrowotnej, Wrocław; Uniwersytecki Szpital Kliniczny im. Jana Mikulicza- Radeckiego we Wrocławiu; Śląskie Centrum Chorób Serca, Zabrze; Samodzielny Publiczny Szpital Wojewódzki im. Papieża Jana Pawła II, Zamość.
